# Supplementary material for: Clinical and in vitro models identify distinct adaptations enhancing Staphylococcus aureus pathogenesis in human macrophages
Source: PubMed Central journal article supplement (PMC11265673; doi:10.1371/journal.ppat.1012394), 2024-07-11

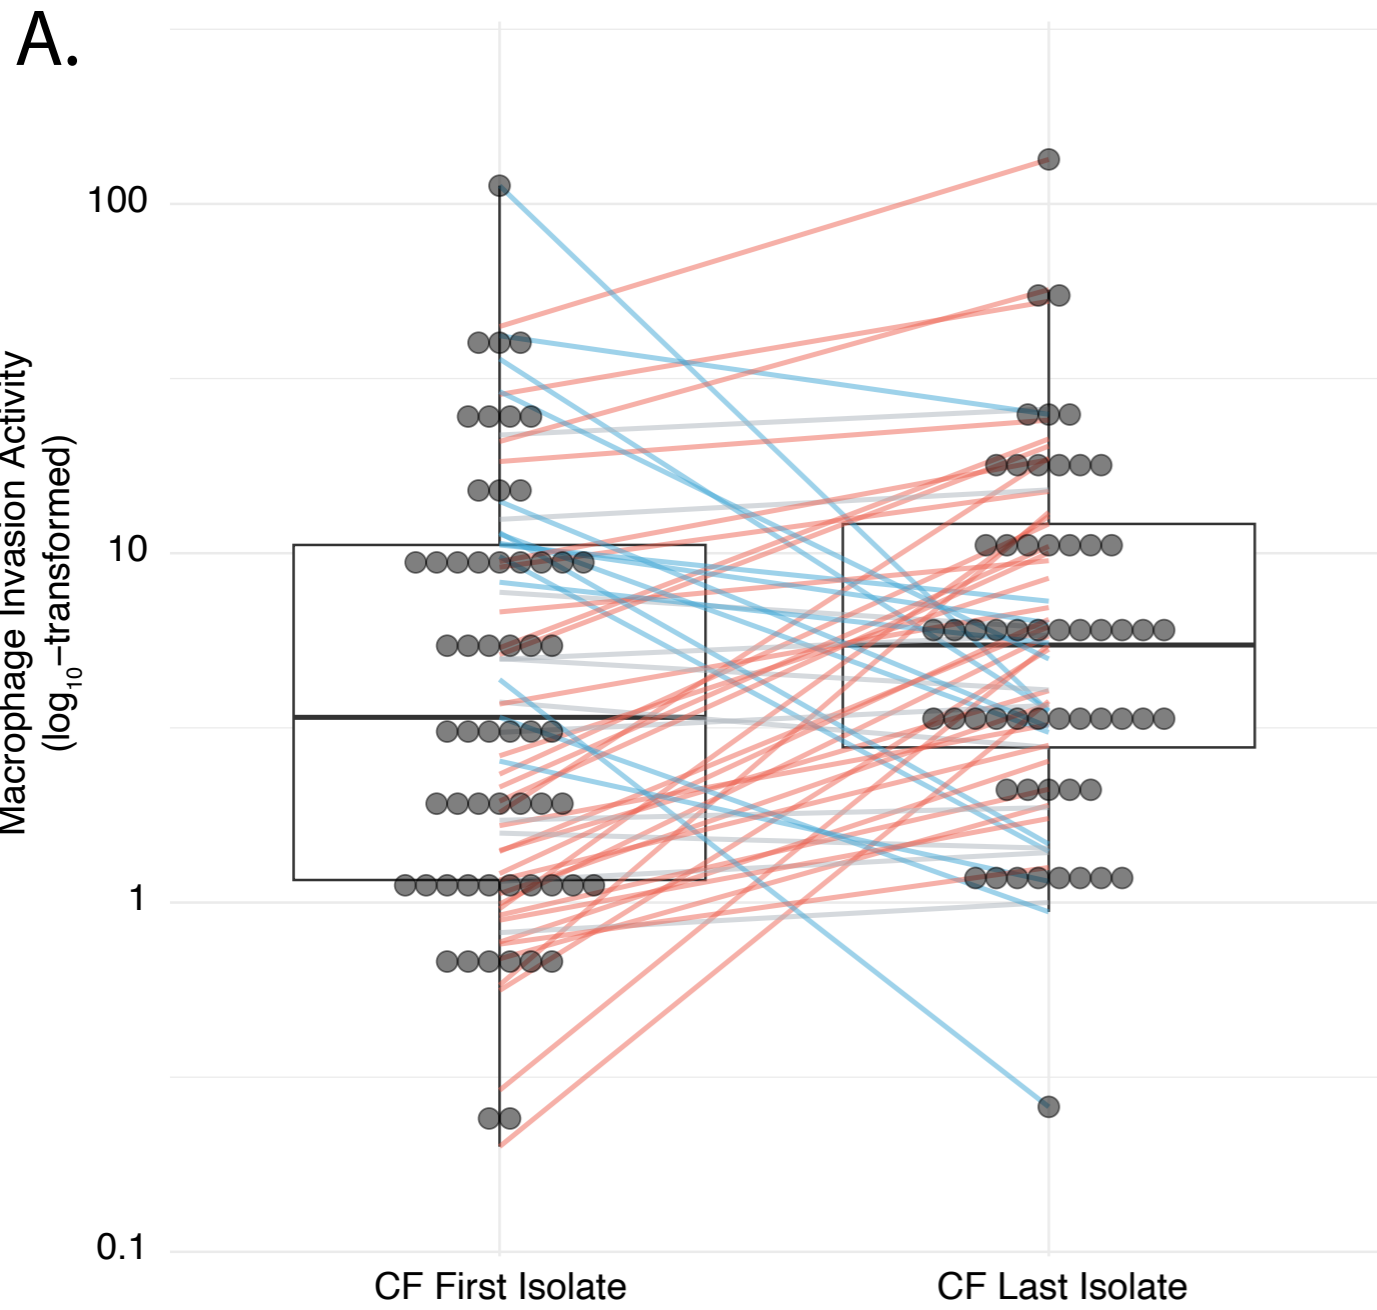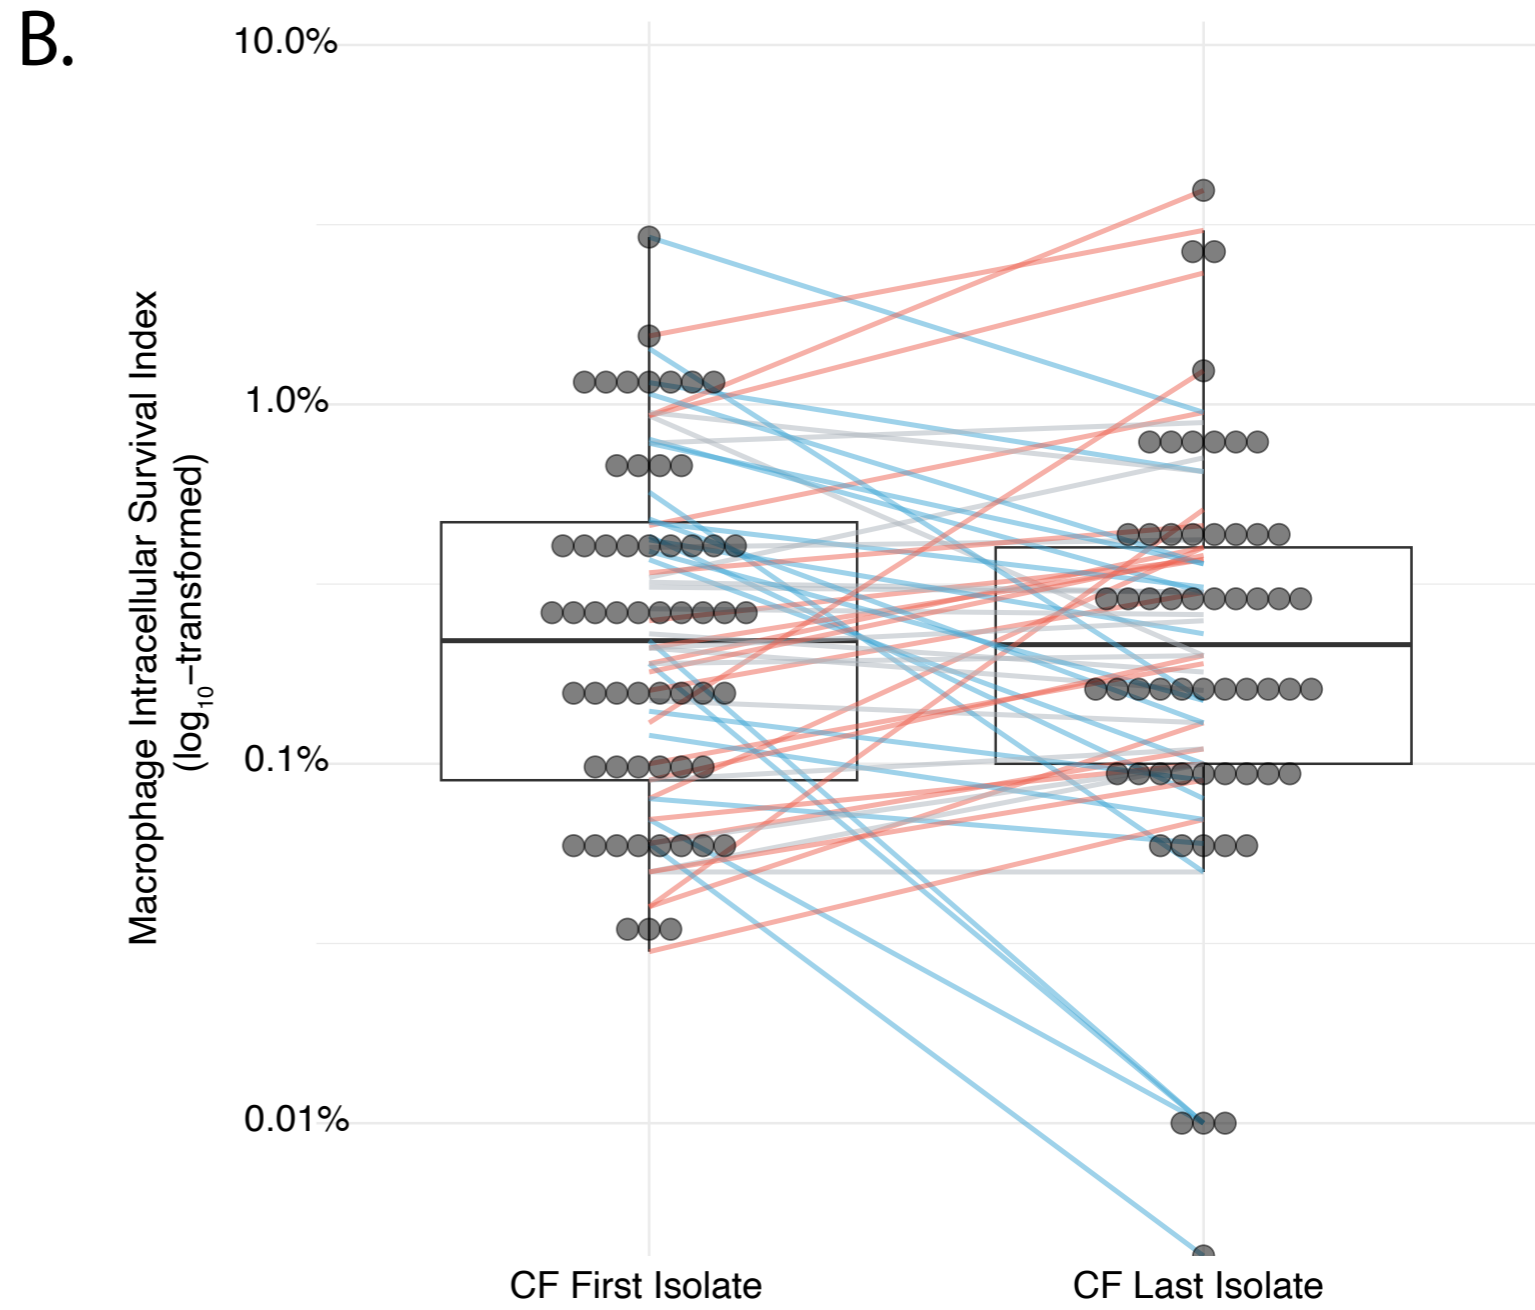

Supplement: ppat.1012394.s015.pdf [file ppat.1012394.s015.pdf]
